# Supplementary material for: Fusion of Intratumoral and Peritumoral Ultrasound Radiomics with Clinical Features for Distinguishing Diffuse Large B-cell Lymphoma from Hodgkin Lymphoma
Source: Research Square preprint supplement (doi:10.21203/rs.3.rs-7981034/v1), 2025-11-20
Supplement: Supplementary file 1 [file 63d01f8087fb767073d48b55.docx]

**Supplementary Materials**

**Fusion of Intratumoral and Peritumoral Ultrasound Radiomics with Clinical Features for Distinguishing Diffuse Large B-cell Lymphoma from Hodgkin Lymphoma**

*LiHong Yia, JiaXin Wanga, Xue Lia, Ling Hea, LiPing Liu*a*

*aDepartment of Ultrasound, The First Affiliated Hospital of Chongqing MedicalUniversity, No.1 Youyi Road, Yuzhong District, Chongqing, 400016, China*

**Figure S1. (1) Radiomics feature selection based on the least absolute shrinkage and selection operator algorithm. intratumoral region (a,b); extended 8-pixel patches (d,e); extended 16-pixel patches (g,h); extended 24-pixel patches (j,k). (2) Histogram of the Rad-score based on selected features. Original ROI (c); extended 8-pixel patches (f); extended 16-pixel patches (i); extended 30-pixel patches (l).**

**
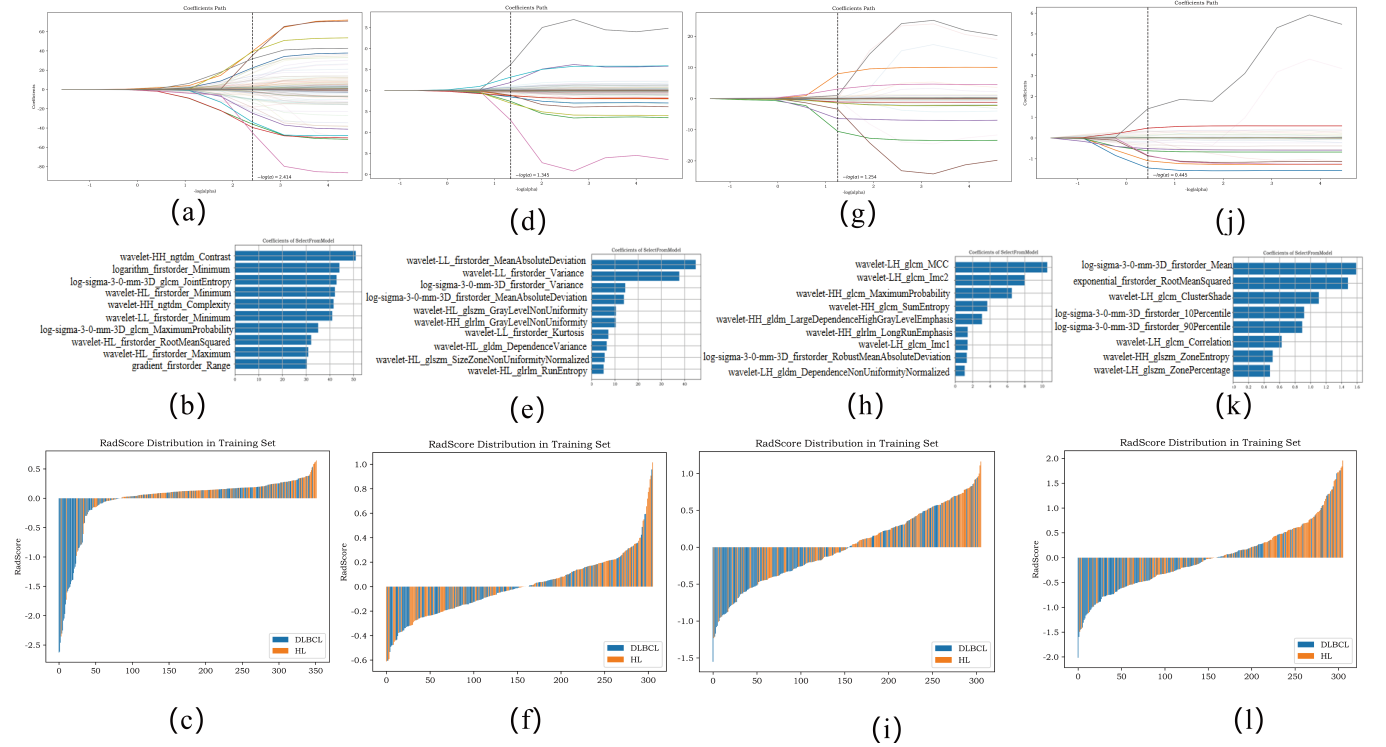
**

**Figure S2. Calibration curves of the different models in the training and test groups. (a)Calibration curves of the four radiomics models. (b) Calibration curves of the Clinical,Radexpand16 and two fusion models.**

**
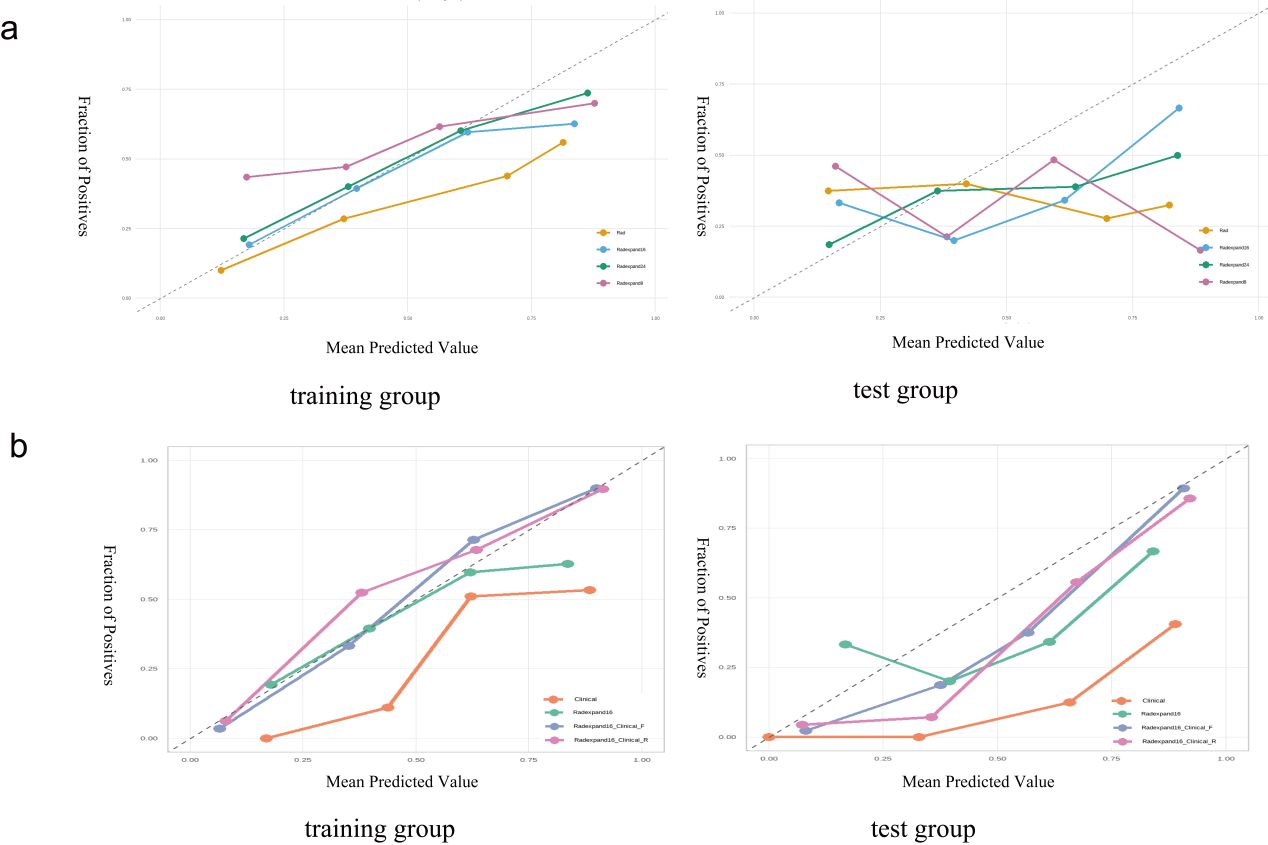
**

**Figure S3.** **Decision curve analysis (DCA) of the different models in the training and test groups. (a)** **DCA of the Rad signature. (b)** **DCA of the Clinical,Radexpand16 and two fusion models.**

**
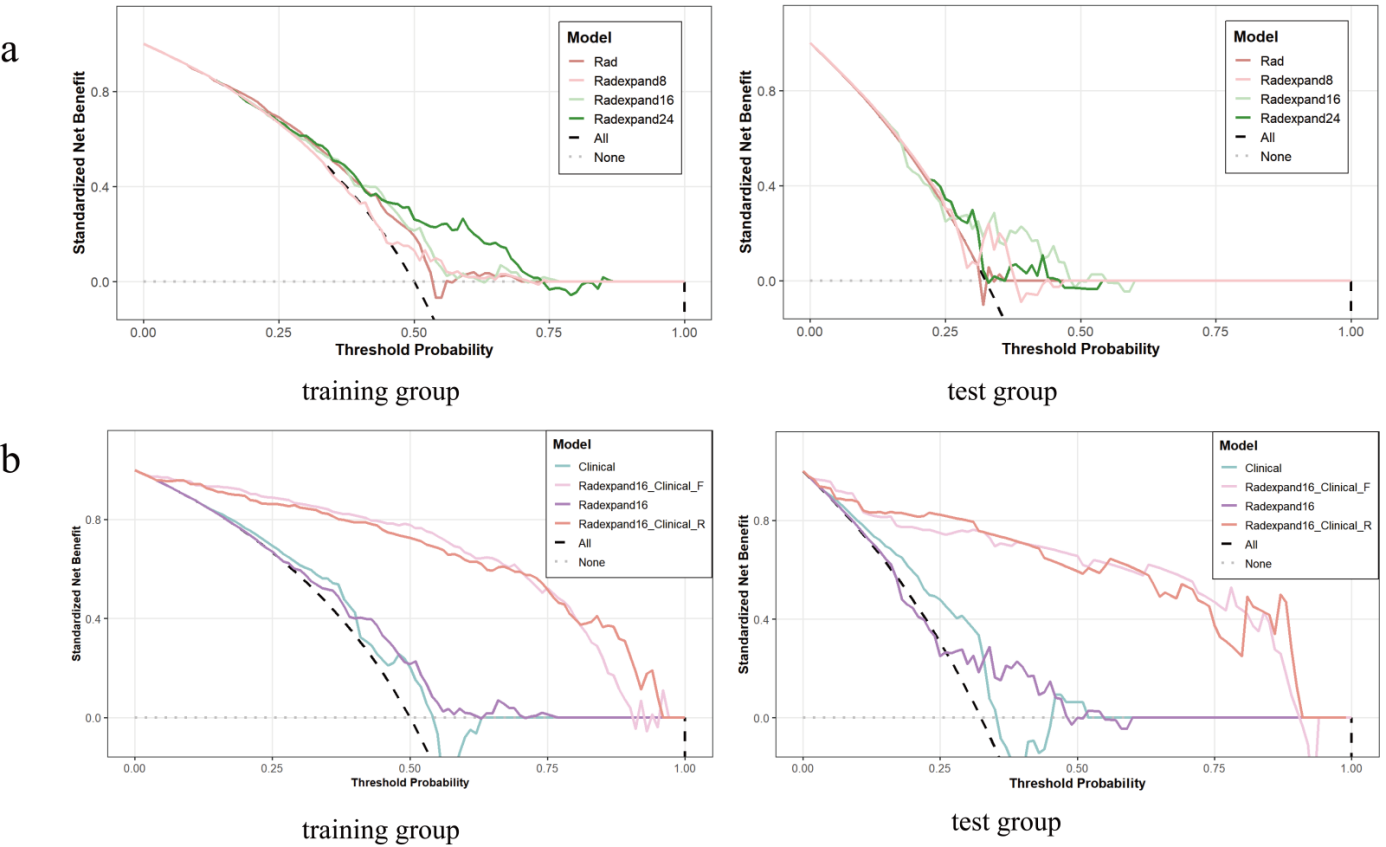
**

**Figure S4. Nomogram for the Radexpand16_Clinical_R model.**

**
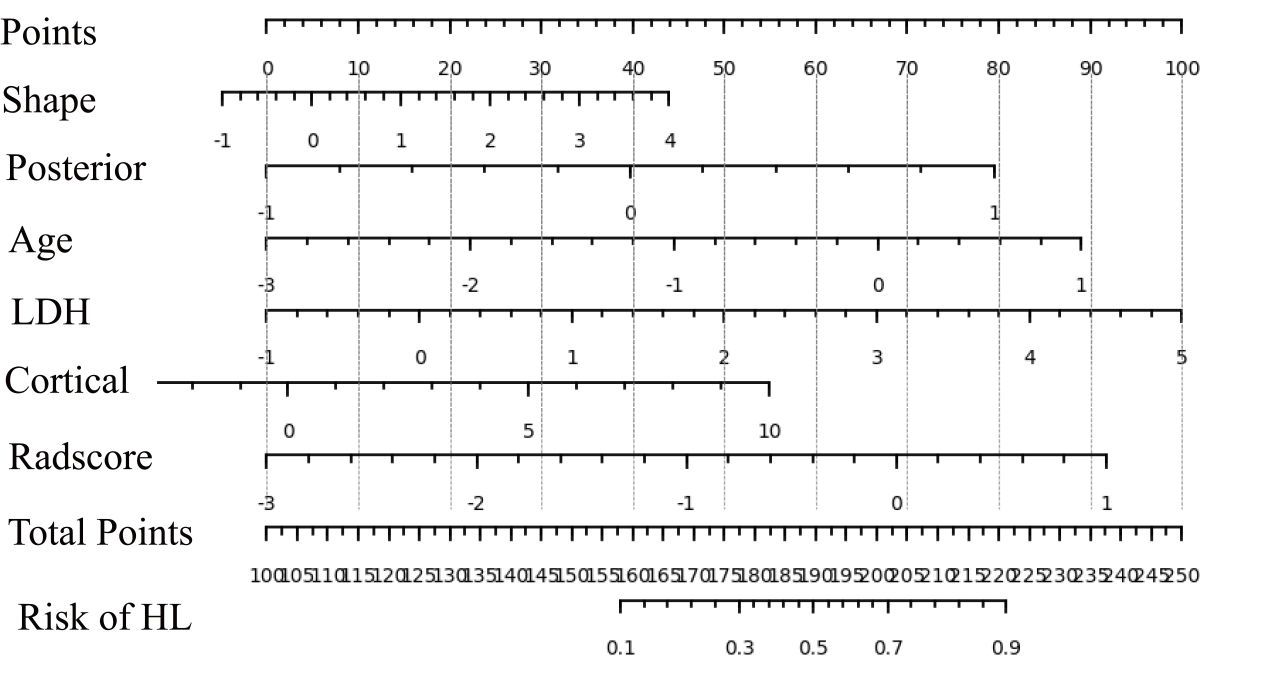
**
